# Supplementary material for: 18-valence-electron rule lighted planar tetracoordinate carbon and nitrogen: the global energy minima of CAl4Zn and NAl4Zn+
Source: Royal Society of Chemistry journal article supplement (doi:10.1039/d2cp04743h), 2023-01-01
Supplement: d2cp04743h1.pdf [file d2cp04743h1.pdf]

Supplementary Information

**18-valence-electron rule lighted planar tetracoordinate carbon and  
nitrogen: the global energy minima of  $\text{CAI}_4\text{Zn}$  and  $\text{NAl}_4\text{Zn}^+$**

Xiu-dong Jia,<sup>\*a</sup> Zhi-wei Du<sup>b</sup>

- a. Institute of Molecular Science, Shanxi University, Taiyuan, 030006, People's Republic of China.
- b. School of Chemistry and Chemical Engineering, Shanxi University, Taiyuan, 030006, People's Republic of China.

\* To whom correspondence should be addressed

Email: [202012801006@email.sxu.edu.cn](mailto:202012801006@email.sxu.edu.cn) (Xiu-dong Jia)

**Contents**

**SI-1**

**Fig. S1** Structures and relative energies ( $\Delta E$ , in kcal mol<sup>-1</sup> at CCSD(T) + ZPE<sub>B2PLYP-D3(BJ)</sub> level) of  $\text{CAI}_4$  (**1a'**),  $\text{NAl}_4^+$  (**2a'**) and their low-energy isomers.

**Fig.S2** AdNDP bonding patterns with occupation numbers (ONs) of  $\text{CAI}_4$  and  $\text{NAl}_4^+$  (**1a'** and **2a'**).

**Fig.S3** AdNDP bonding patterns with occupation numbers (ONs) of  $\text{NAl}_4\text{Zn}^+$  (**2a**).

**Fig.S4** The orbital energy spectrums and the valence canonical molecular orbitals of **1a** and **2a**.

**Fig.S5** The orbital energy spectrums and the valence canonical molecular orbitals of **1b** and **2d**.

**Fig.S6** The NICS results for **1b** and **2d** at the B3LYP/aug-cc-pVTZ level. The unit of NICS values is in ppm.

**SI-2**

Cartesian Coordinates for the structures shown in **Fig. 2**.

SI-1

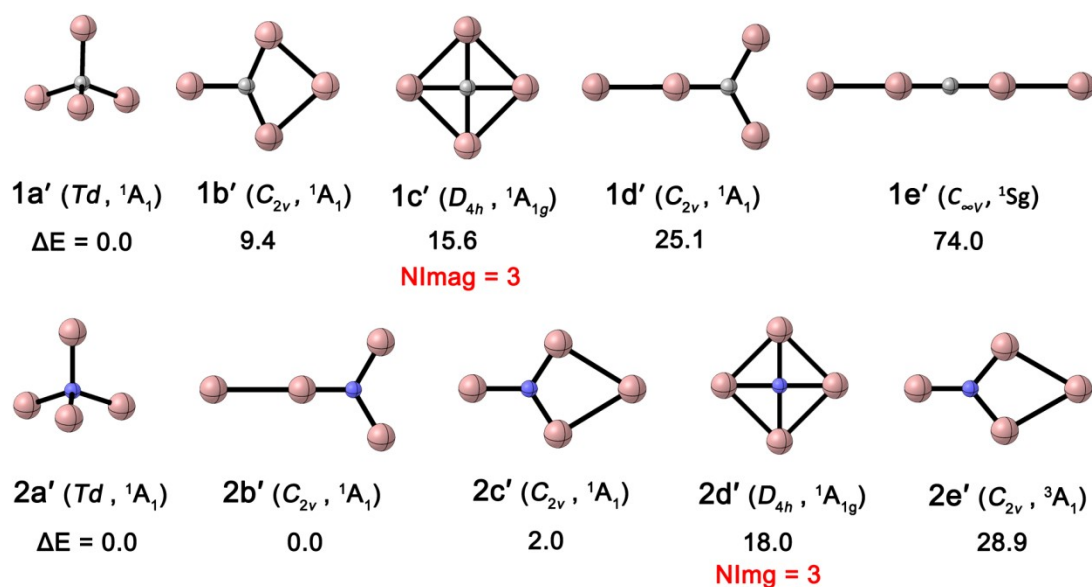

**Fig.S1** Structures and relative energies ( $\Delta E$ , in kcal mol<sup>-1</sup> at CCSD(T) + ZPE<sub>B2PLYP-D3(BJ)</sub> level) of  $CAI_4$  (**1a'**),  $NAI_4^+$  (**2a'**) and their low-energy isomers.

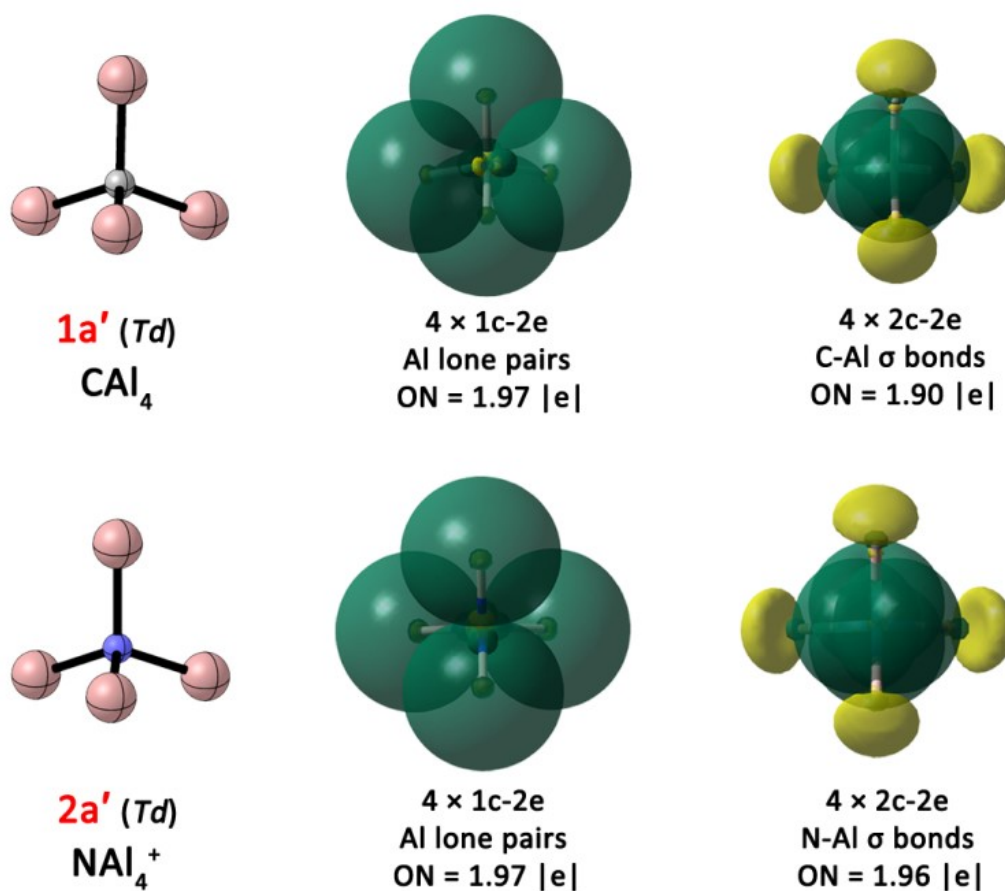

**Fig.S2** AdNDP bonding patterns with occupation numbers (ONs) of  $CAI_4$  and  $NAI_4^+$  (**1a'** and **2a'**).

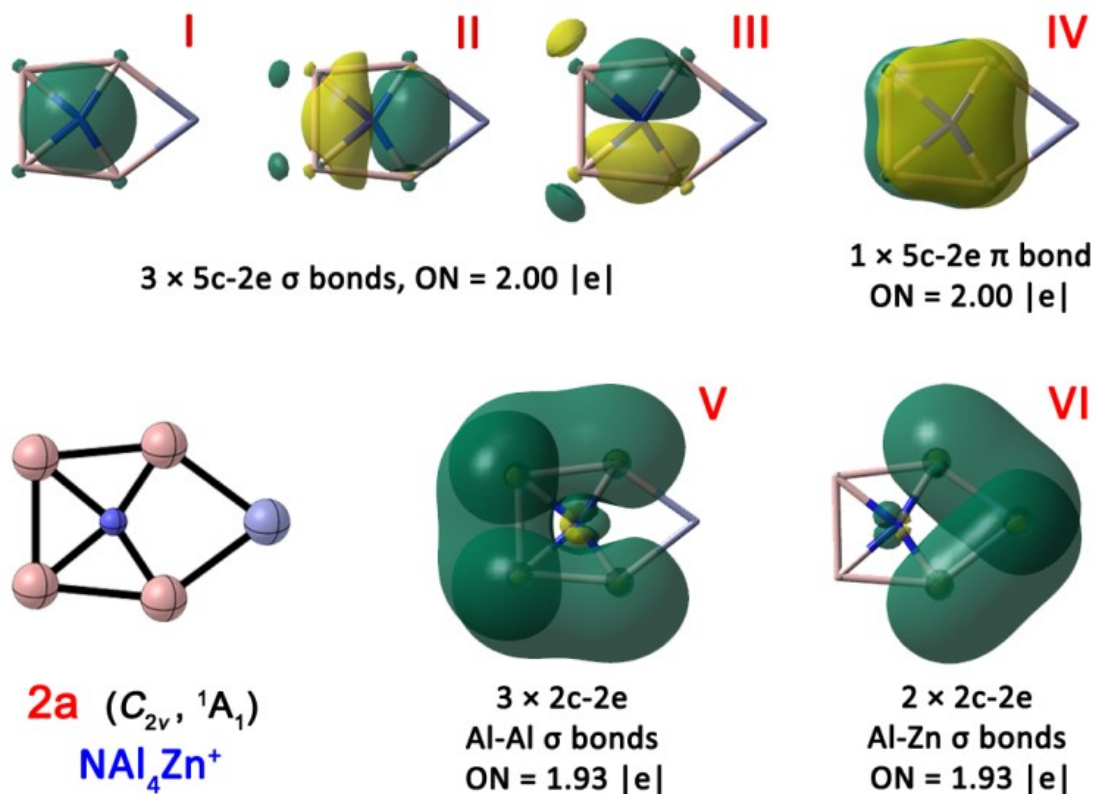

Fig.S3 AdNDP bonding patterns with occupation numbers (ONs) of  $NAl_4Zn^+$  (**2a**).

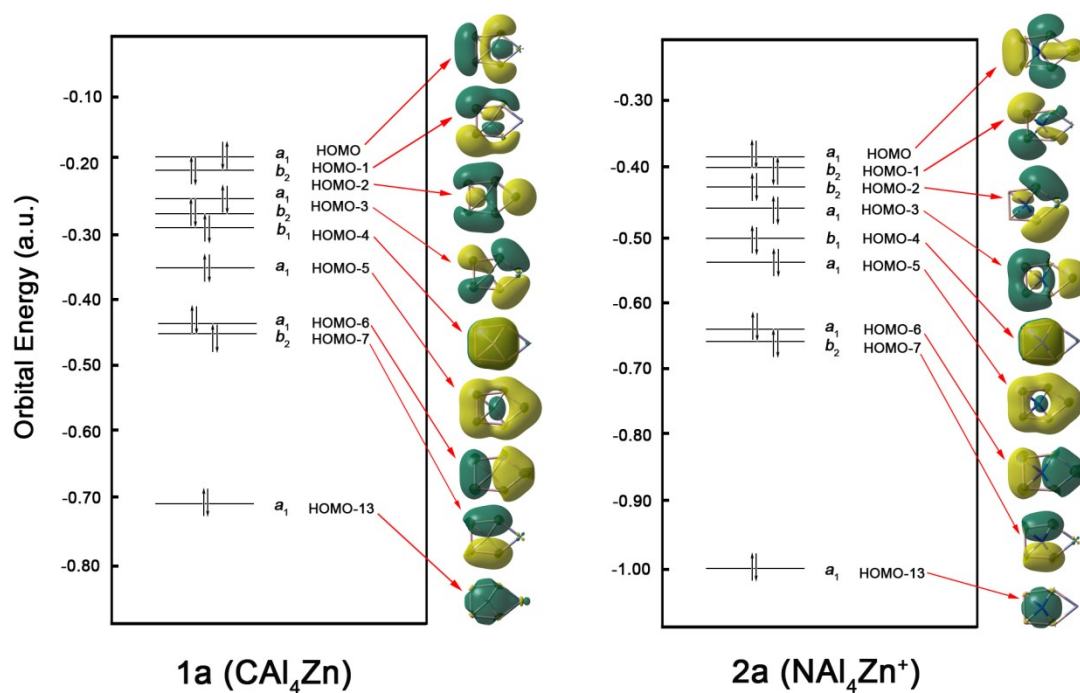

Fig.S4 The orbital energy spectrums and the valence canonical molecular orbitals of **1a** and **2a**.

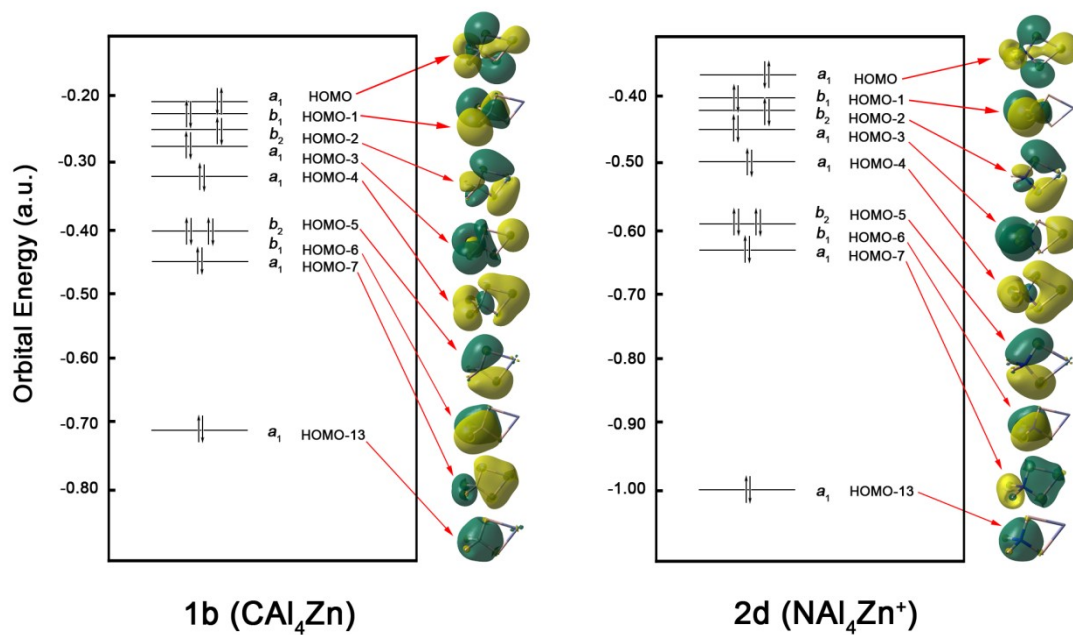

Fig.S5 The orbital energy spectrums and the valence canonical molecular orbitals of **1b** and **2d**.

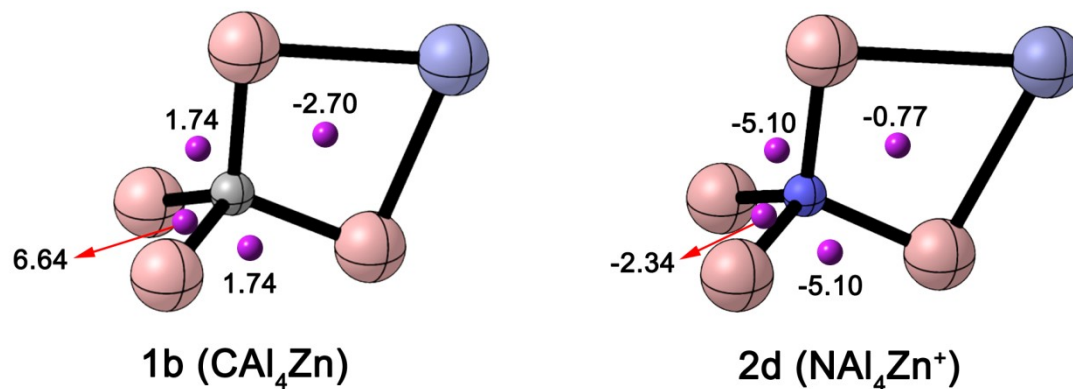

Fig.S6 The NICS results for **1b** and **2d** at the B3LYP/aug-cc-pVTZ level. The unit of NICS values is in ppm.

B2PLYP-D3(BJ)/aug-cc-pVTZ-optimized structures for structures shown in **Fig. 2**.

**1a**

|    |            |             |             |
|----|------------|-------------|-------------|
| C  | 0.00000000 | 0.00000000  | -0.91643600 |
| Al | 0.00000000 | 1.33574000  | -2.49650500 |
| Al | 0.00000000 | -1.33574000 | -2.49650500 |
| Al | 0.00000000 | 1.59862500  | 0.16667700  |
| Al | 0.00000000 | -1.59862500 | 0.16667700  |
| Zn | 0.00000000 | 0.00000000  | 2.20247100  |

**1b**

|    |             |             |             |
|----|-------------|-------------|-------------|
| C  | 0.00000000  | 0.00000000  | -1.18064600 |
| Al | 0.00000000  | 1.64667300  | -0.00159500 |
| Al | 1.64184800  | 0.00000000  | -2.35164300 |
| Al | 0.00000000  | -1.64667300 | -0.00159500 |
| Al | -1.64184800 | 0.00000000  | -2.35164300 |
| Zn | 0.00000000  | 0.00000000  | 2.27560200  |

**1c**

|    |             |             |             |
|----|-------------|-------------|-------------|
| C  | -1.36927300 | 0.83856400  | 0.49849000  |
| Al | -0.08500500 | 2.09604900  | -0.26196500 |
| Al | -2.53630300 | -0.11738400 | -0.69812400 |
| Al | -0.39748000 | -0.31123100 | 1.66965200  |
| Al | -0.27068200 | -1.91770500 | -0.39720100 |
| Zn | 1.69929200  | -0.05926200 | -0.23505500 |

**1d**

|    |             |             |             |
|----|-------------|-------------|-------------|
| C  | -0.60267300 | 1.45886900  | 0.00000000  |
| Al | 0.10614600  | 0.93380900  | 1.69438700  |
| Al | 1.98015300  | -0.06659100 | 0.00000000  |
| Al | 0.10614600  | 0.93380900  | -1.69438700 |
| Al | -2.15924200 | 2.63561900  | 0.00000000  |

|    |            |             |            |
|----|------------|-------------|------------|
| Zn | 0.10614600 | -2.21432100 | 0.00000000 |
|----|------------|-------------|------------|

**1e**

|    |             |             |            |
|----|-------------|-------------|------------|
| C  | 1.71760000  | 0.54220100  | 0.00000000 |
| Al | 0.00000000  | 1.27163100  | 0.00000000 |
| Al | 1.43853600  | -1.33917800 | 0.00000000 |
| Al | 3.36846300  | 1.57181300  | 0.00000000 |
| Al | -2.78113100 | 1.15816500  | 0.00000000 |
| Zn | -1.22139600 | -1.26216000 | 0.00000000 |

**2a**

|    |            |             |             |
|----|------------|-------------|-------------|
| N  | 0.00000000 | 0.00000000  | -0.89893200 |
| Al | 0.00000000 | 1.57159900  | 0.13727200  |
| Al | 0.00000000 | -1.31541000 | -2.49360900 |
| Al | 0.00000000 | -1.57159900 | 0.13727200  |
| Al | 0.00000000 | 1.31541000  | -2.49360900 |
| Zn | 0.00000000 | 0.00000000  | 2.25190900  |

**2b**

|    |             |             |            |
|----|-------------|-------------|------------|
| N  | 1.66838900  | 0.63774200  | 0.00000000 |
| Al | -2.92779100 | 1.08248100  | 0.00000000 |
| Al | 3.24516100  | 1.69378100  | 0.00000000 |
| Al | 1.64017500  | -1.21955900 | 0.00000000 |
| Al | 0.00000000  | 1.31014000  | 0.00000000 |
| Zn | -1.23756100 | -1.39110500 | 0.00000000 |

**2c**

|    |             |             |            |
|----|-------------|-------------|------------|
| N  | 0.96617800  | -0.61848800 | 0.00000000 |
| Al | 2.35175500  | 2.67556300  | 0.00000000 |
| Al | -0.12033100 | -2.14352800 | 0.00000000 |

|    |             |             |            |
|----|-------------|-------------|------------|
| Al | 0.00000000  | 0.95915200  | 0.00000000 |
| Al | 2.75227900  | -0.31200500 | 0.00000000 |
| Zn | -2.38504600 | -0.36666400 | 0.00000000 |

**2d**

|    |             |             |             |
|----|-------------|-------------|-------------|
| Al | 0.00000000  | 1.64146000  | -0.08343100 |
| Al | 1.64174800  | 0.00000000  | -2.40311400 |
| Al | 0.00000000  | -1.64146000 | -0.08343100 |
| Al | -1.64174800 | 0.00000000  | -2.40311400 |
| Zn | 0.00000000  | 0.00000000  | 2.44629000  |
| N  | 0.00000000  | 0.00000000  | -1.24836200 |

**2e**

|    |            |             |             |
|----|------------|-------------|-------------|
| N  | 0.00000000 | 0.00000000  | -0.54463700 |
| Al | 0.00000000 | 0.00000000  | -5.33575900 |
| Al | 0.00000000 | 0.00000000  | -2.30442200 |
| Al | 0.00000000 | 1.60341600  | 0.46930800  |
| Al | 0.00000000 | -1.60341600 | 0.46930800  |
| Zn | 0.00000000 | 0.00000000  | 3.03109400  |
